# Supplementary material for: Fluorescence fluctuation of an antigen–antibody complex: circular dichroism, FCS and smFRET of enhanced GFP and its antibody
Source: Royal Society of Chemistry journal article supplement (doi:10.1039/c5cp04908c), 2015-01-01
Supplement: c5cp04908c1.pdf [file c5cp04908c1.pdf]

## Electronic Supplementary Information

### **Fluorescence Fluctuation of Antigen-Antibody Complex: Circular Dichroism, FCS and smFRET of Enhanced GFP and its Antibody**

Debmalya Bhunia,<sup>a#</sup> Rajdeep Chowdhury,<sup>b#</sup> Kankan Bhattacharyya<sup>\*b</sup> and Surajit Ghosh<sup>\*a</sup>

<sup>a</sup>Organic & Medicinal Chemistry Division, CSIR-Indian Institute of Chemical Biology, Jadavpur, Kolkata-700032, India.

<sup>b</sup>Department of Physical Chemistry, Indian Association for the Cultivation of Science, Jadavpur, Kolkata-700032, India.

#: Equal Contribution

\***E-mail:** sghosh@iicb.res.in, pckb@iacs.res.in.

**Table S1.** Diffusion time ( $\tau_D$ ), diffusion coefficient ( $D_t$ ), hydrodynamics radius ( $r_H$ ) and parameters of proton transfer dynamics for EGFP.

| System | [GdnHCl] | $\tau_D$ (mS) | $D_t$ ( $\text{mm}^2\text{s}^{-1}$ ) | $r_H$ (Å) | $\tau_C$ [F] (mS) |
|--------|----------|---------------|--------------------------------------|-----------|-------------------|
| EGFP   | 0 M      | 1000±100      | 83±8                                 | 24.4±2    | 400±50 [0.6]      |
|        | 1 M      | 1400±150      | 59±6                                 | 34.1±2    | 220±30 [0.5]      |
|        | 2 M      | 1700±150      | 49±6                                 | 39.5±2    | 270±30 [0.69]     |
|        | 3 M      | 1900±200      | 43.5±4                               | 41.3±2    | 330±30 [0.69]     |
|        | 4 M      | 2100±200      | 39±4                                 | 42±2      | 400±50 [0.72]     |

**Table S2.** Diffusion time ( $\tau_D$ ), diffusion coefficient ( $D_t$ ), hydrodynamics radius ( $r_H$ ) and parameters of conformational dynamics for alexa 488 labeled anti-EGFP V<sub>H</sub>H-His<sub>6</sub>.

| System                                         | [GdnHCl] | $\tau_D$ ( $\square$ S) | $D_t$<br>( $\square$ m <sup>2</sup> s <sup>-1</sup> ) | $R_H$ ( $\text{\AA}$ ) | $\tau_R$ (F)<br>( $\square$ S) |
|------------------------------------------------|----------|-------------------------|-------------------------------------------------------|------------------------|--------------------------------|
| Anti-EGFP<br>V <sub>H</sub> H-His <sub>6</sub> | 0 M      | 190±20                  | 118±10                                                | 18.4±2                 | 83±10<br>(0.54)                |
|                                                | 1 M      | 212±20                  | 106±10                                                | 20.5±2                 | 82±10<br>(0.6)                 |
|                                                | 2 M      | 230±30                  | 97±10                                                 | 21.1±2                 | 93±10<br>(0.64)                |
|                                                | 3 M      | 250±30                  | 90±5                                                  | 21.4±2                 | 100±10<br>(0.62)               |
|                                                | 4 M      | 275±30                  | 90±5                                                  | 21.2±2                 | 85±10<br>(0.6)                 |

**Table S3.** Diffusion time ( $\tau_D$ ), diffusion coefficient ( $D_t$ ), hydrodynamics radius ( $r_H$ ) and parameters of conformational dynamics for EGFP bound to alexa 594 labeled anti-EGFP  $V_{HH}$ -His<sub>6</sub>.

| System                                        | [GdnHCl] | $\tau_D$ (mS) | $D_t$ (mm <sup>2</sup> s <sup>-1</sup> ) | $R_H$ (Å) | $\tau_R$ [A] (mS) |
|-----------------------------------------------|----------|---------------|------------------------------------------|-----------|-------------------|
| EGFP: anti<br>EGFP $V_{HH}$ -His <sub>6</sub> | 0 M      | 1680±200      | 49±5                                     | 41±3      | 240±30<br>[0.65]  |
|                                               | 1 M      | 1960±200      | 42±5                                     | 48±3      | 230±30<br>[0.58]  |
|                                               | 2 M      | 2200±200      | 38±4                                     | 51±3      | 360 ±40<br>[0.72] |
|                                               | 3 M      | 2320±200      | 36±4                                     | 50±3      | 400 ±50<br>[0.72] |
|                                               | 4 M      | 2410±200      | 34±4                                     | 48±3      | 430 ±50<br>[0.73] |

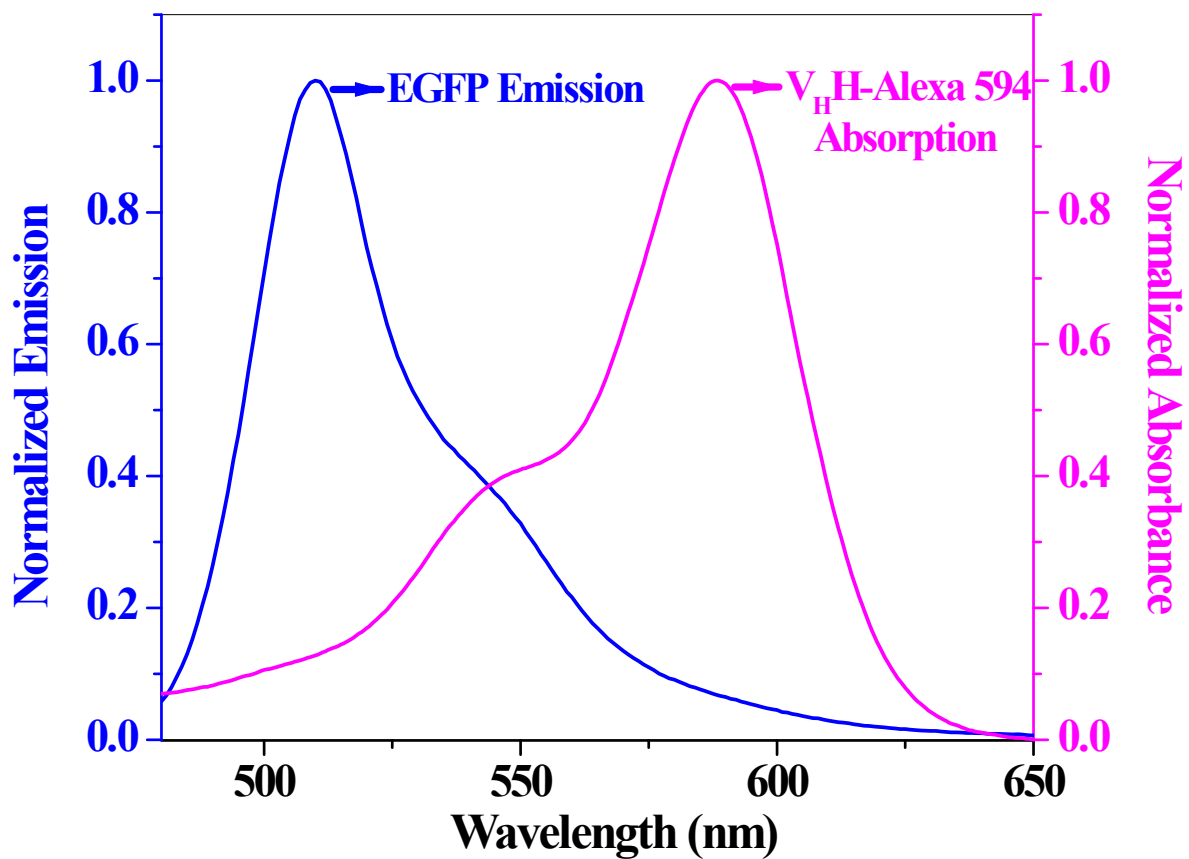

**Figure S1.** Spectral overlap between EGFP (donor) emission and absorbance of alexa 594 labeled anti-EGFP V<sub>H</sub>H-His<sub>6</sub> (acceptor).

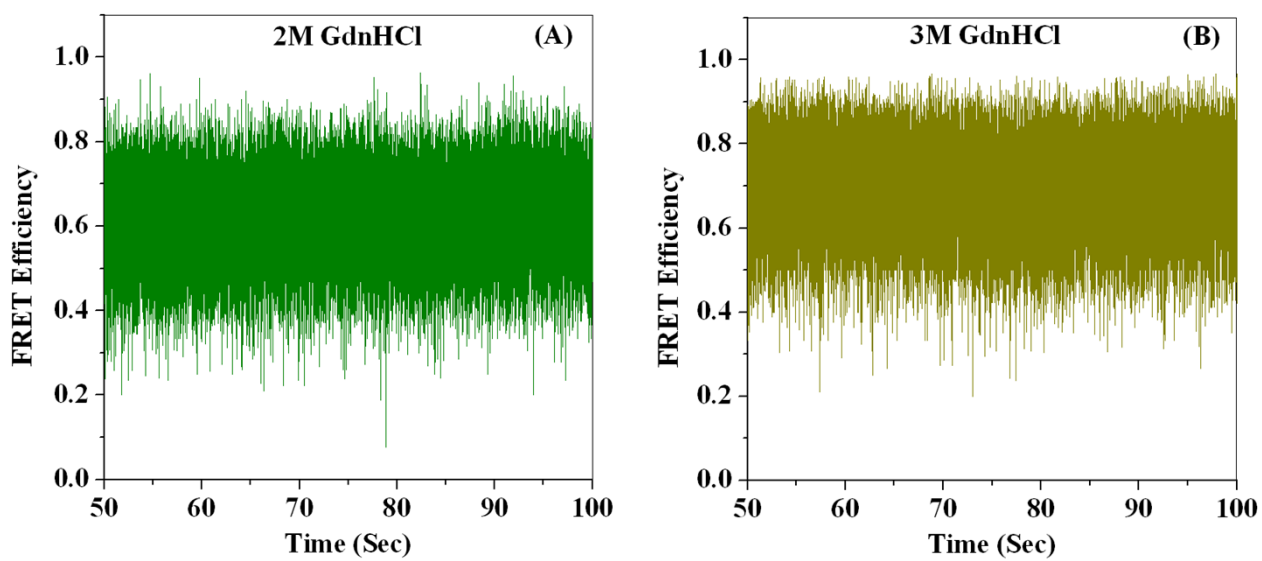

**Figure S2.** Time trajectory of FRET efficiency for EGFP: anti-EGFP V<sub>H</sub>H-His<sub>6</sub> complex in presence of (A) 2M and (B) 3M GdnHCl.
